# Supplementary material for: Phenanthroimidazole derivatives as emitters for non-doped deep-blue organic light emitting devices
Source: Royal Society of Chemistry journal article supplement (doi:10.1039/c6ra13605b), 2016-01-01

*Electronic Supplementary Information for*

**Phenanthroimidazole derivatives as emitters for non-doped deep-blue organic light emitting devices**

Ying Zhang,<sup>a,b</sup> Jun-Hao Wang,<sup>a</sup> Gaoyi Han,<sup>a</sup> Feng Lu<sup>\*b</sup> and Qing-Xiao Tong<sup>\*b</sup>

*a. Institute of Molecular Science, Shanxi University, Taiyuan 030006, Shanxi Province, China*

*b. Department of Chemistry, Shantou University, Guangdong 515063, China. E-mail: qxtong@stu.edu.cn*

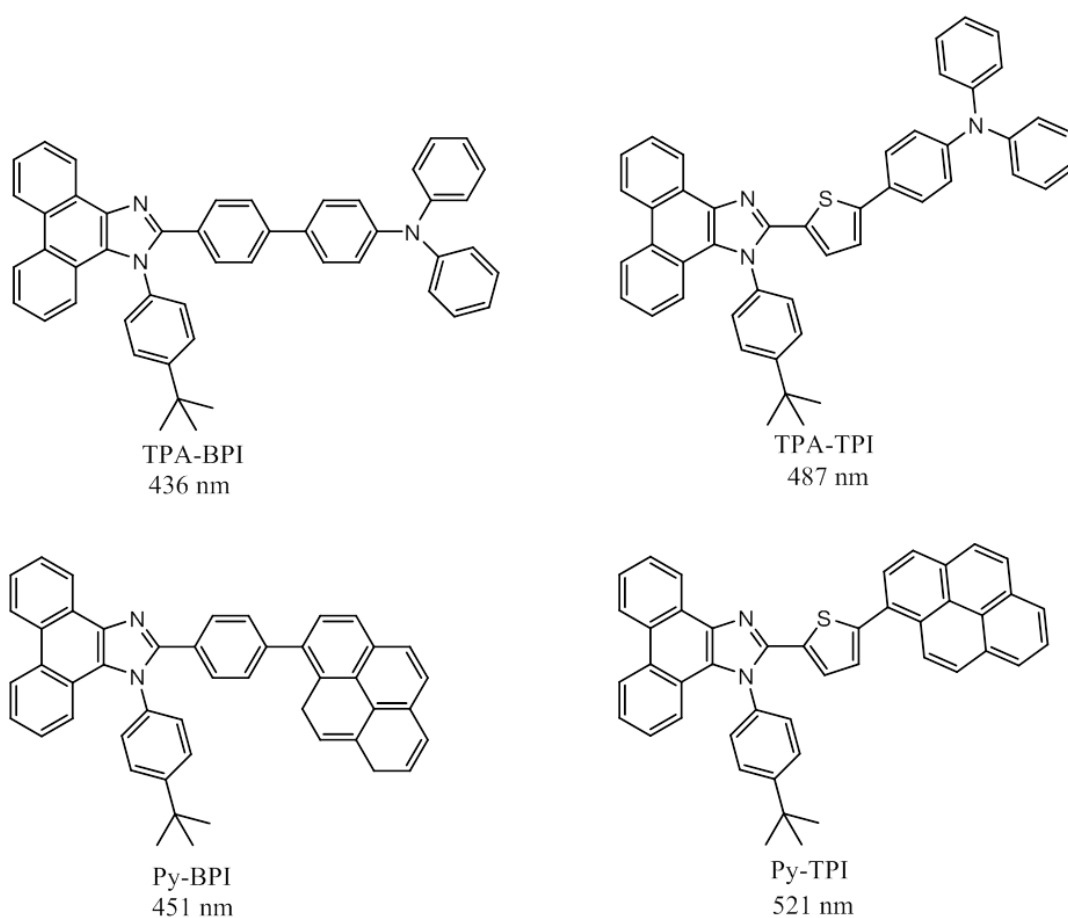

**Fig.S1** Molecule chemical structure of TPA-BPI, Py-BPI, TPA-TPI, Py-TPI and the PLmax wavelength in thin solid film

**Table S1** Dihedral angle of the single crystal structures.

| Crystal Name | A-B    | A-C    | B-D    | C-D    |
|--------------|--------|--------|--------|--------|
| 1N-BPI       | 36.04° | 64.15° | 53.71° | --     |
| 2N-PI        | 1.86°  | 86.33° | --     | --     |
| 2N-API       | 33.27° | 83.64° | --     | 36.23° |

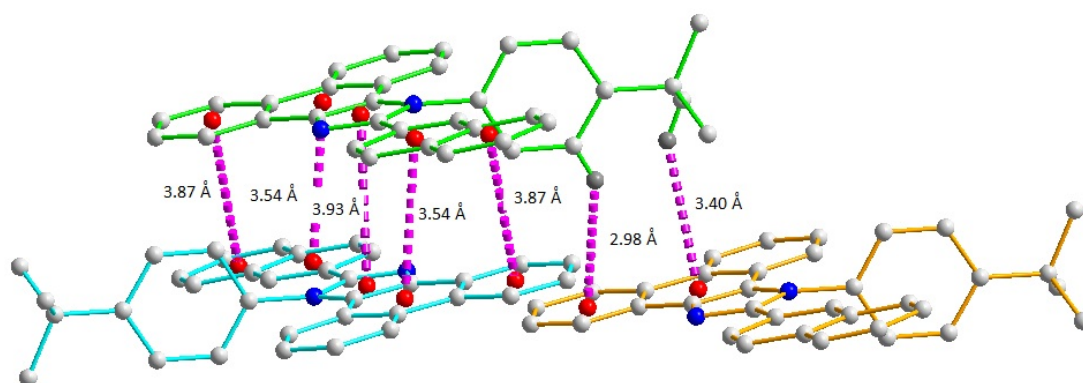

**Fig.S2** Intermolecular interaction analysis for the single crystal of 2N-PI.

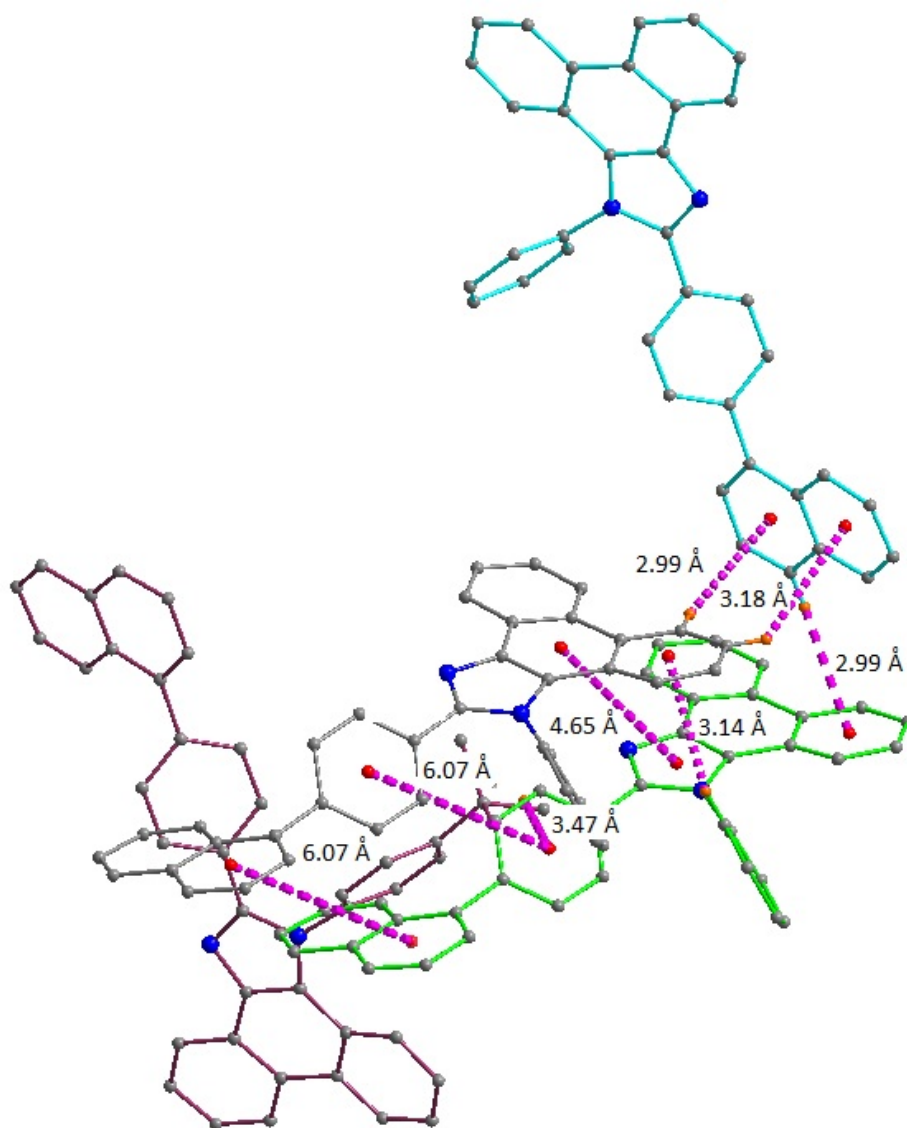

**Fig.S3** Intermolecular interaction analysis for the single crystal of 1N-BPI.

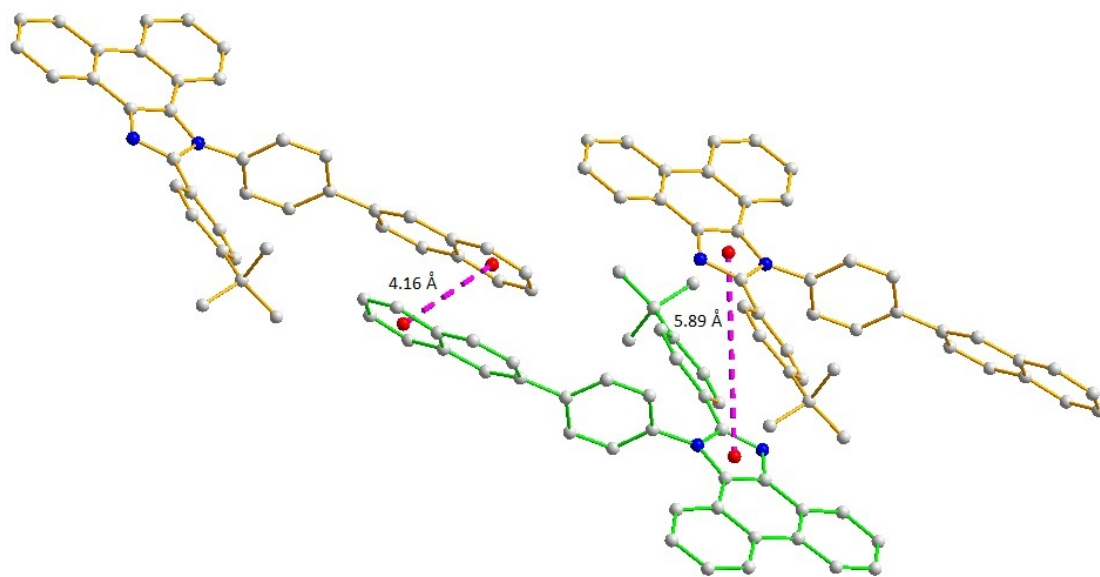

Fig.S4 Intermolecular interaction analysis for the single crystal of 2N-API.

<sup>1</sup>H NMR spectrum for synthesized compounds

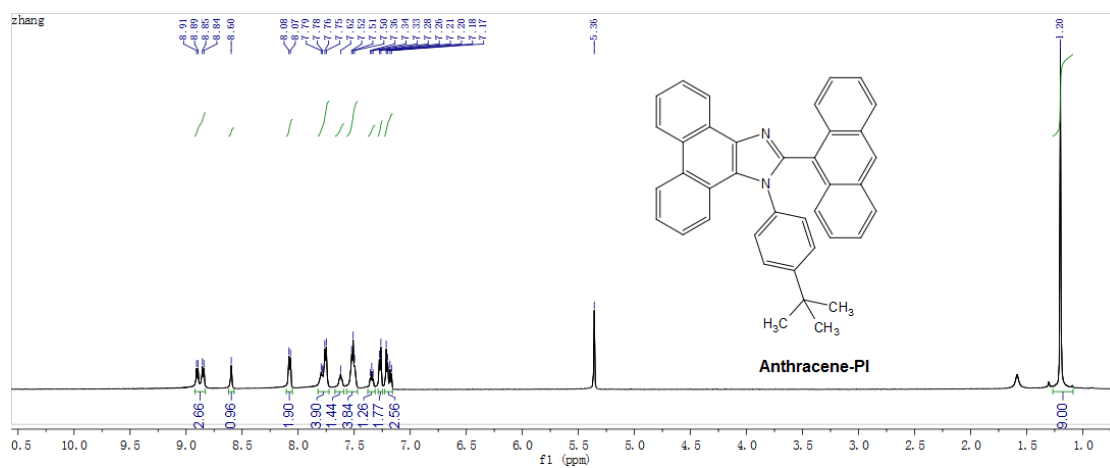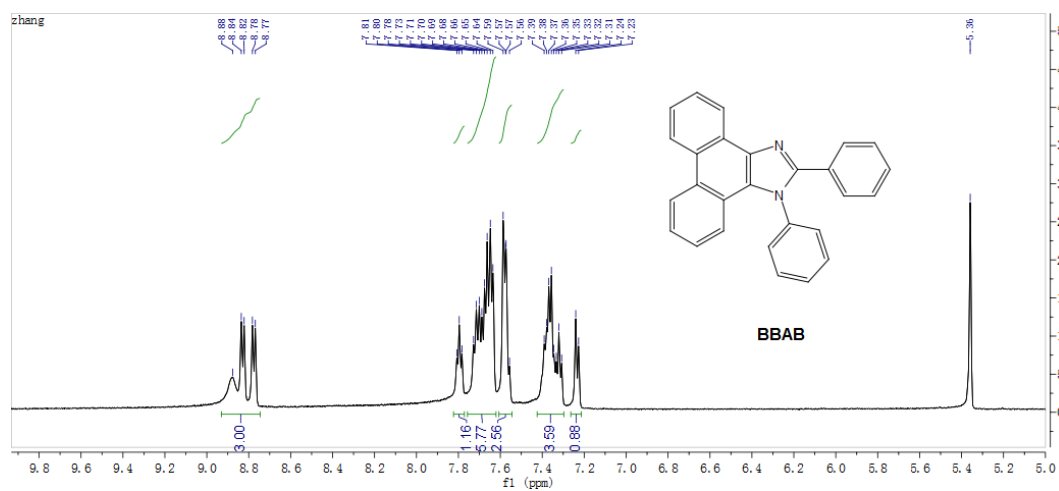

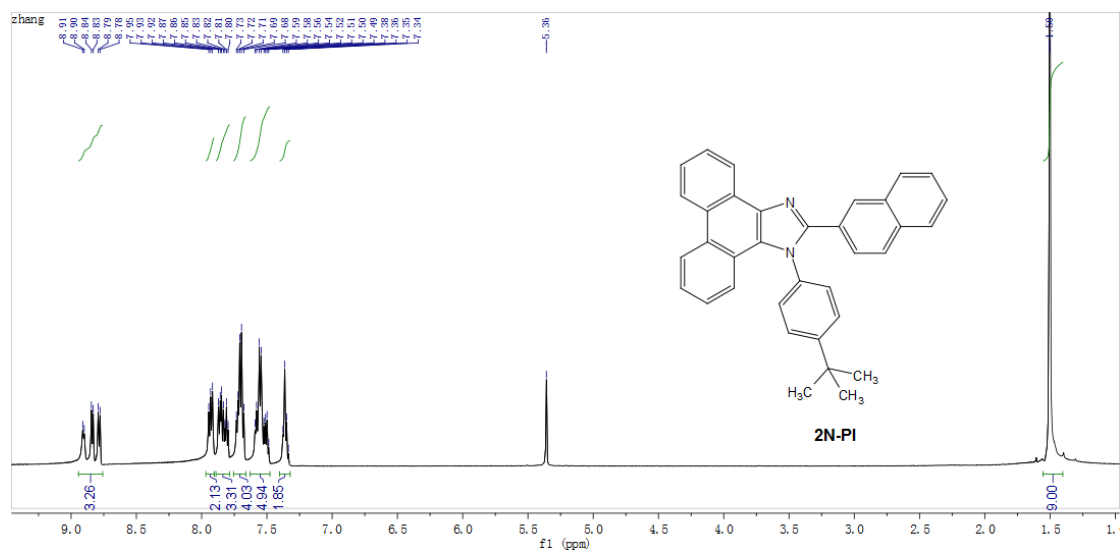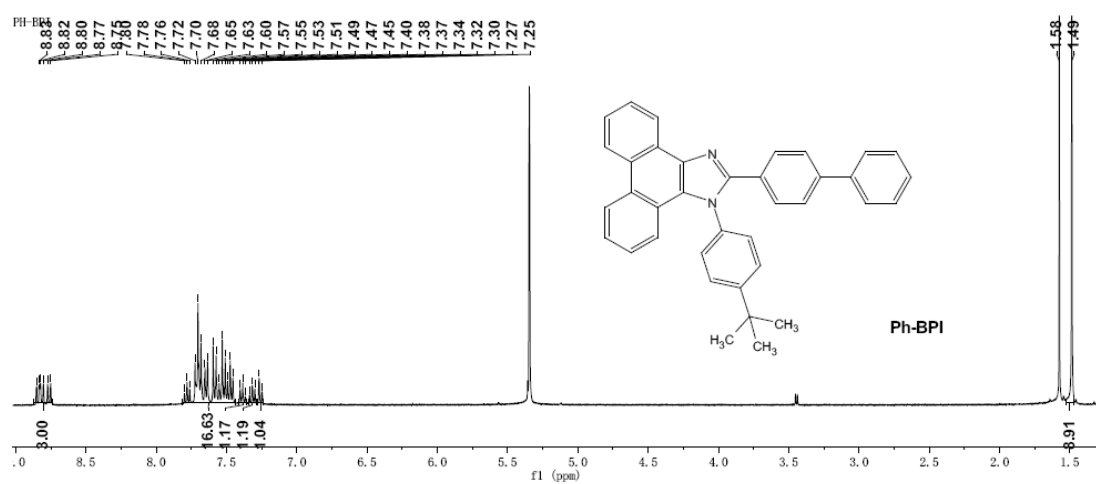



UPS spectrum for synthesized compounds

BBAB

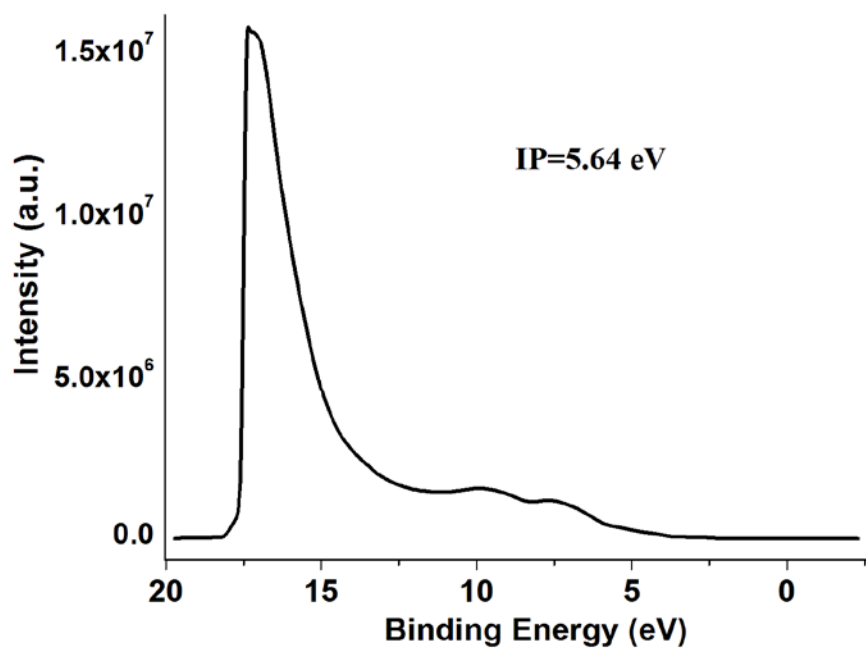

2N-PI

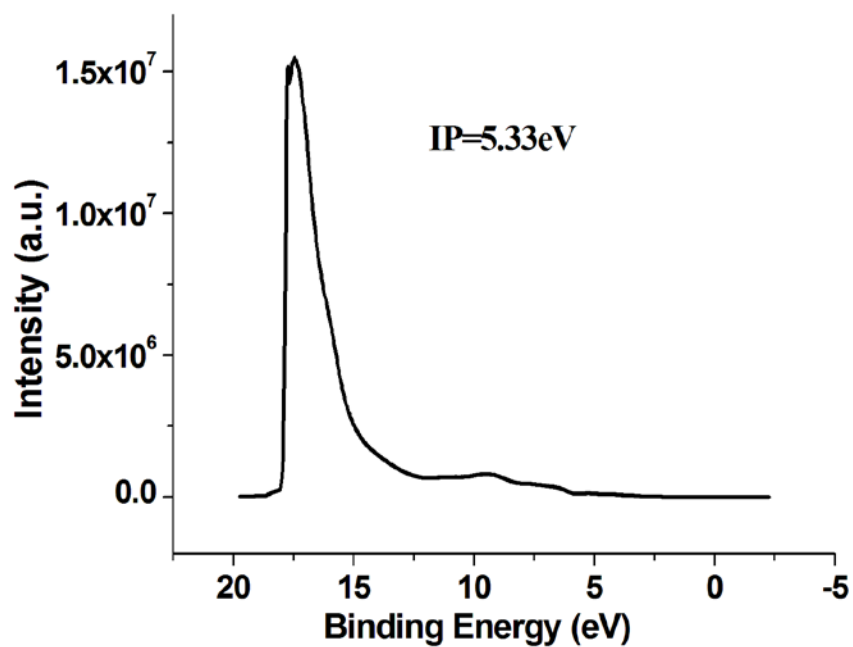

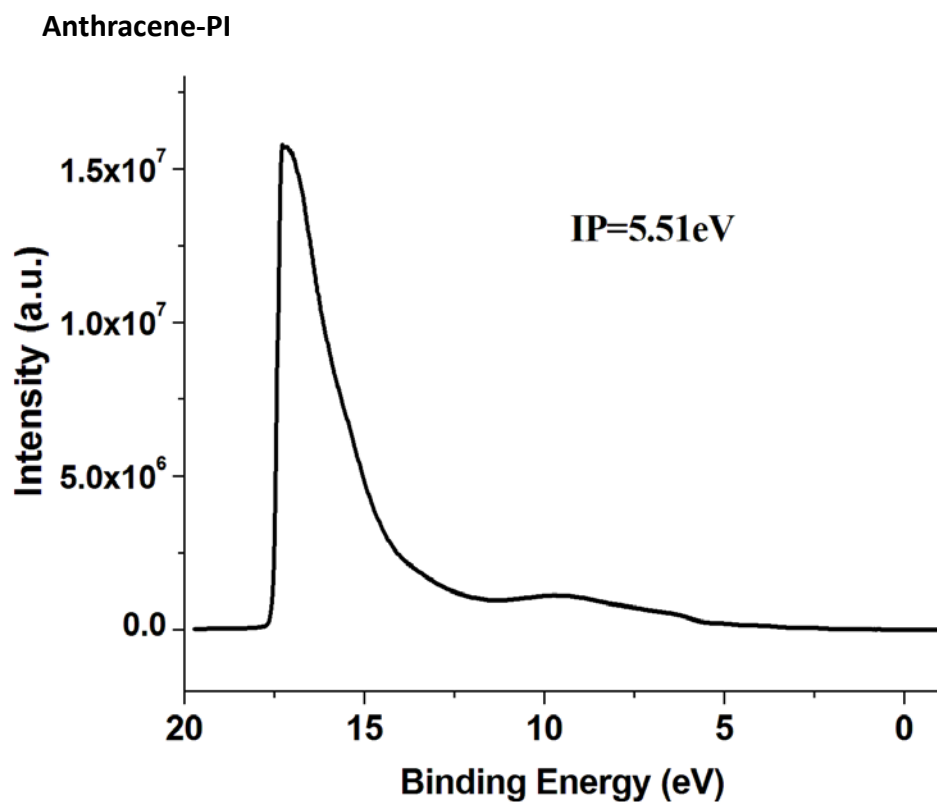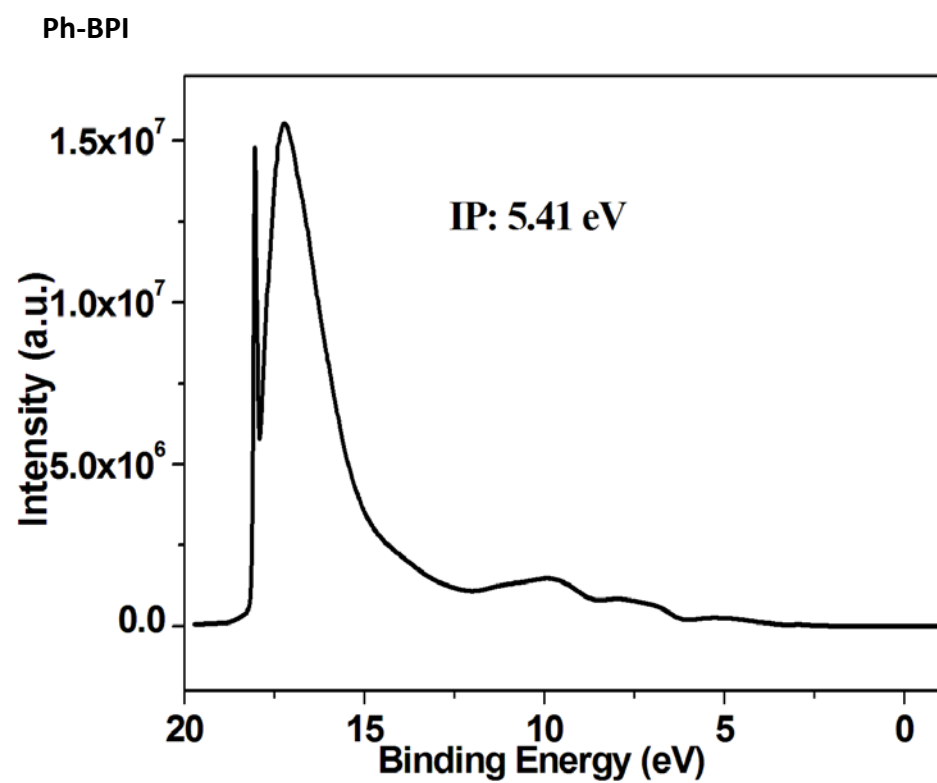



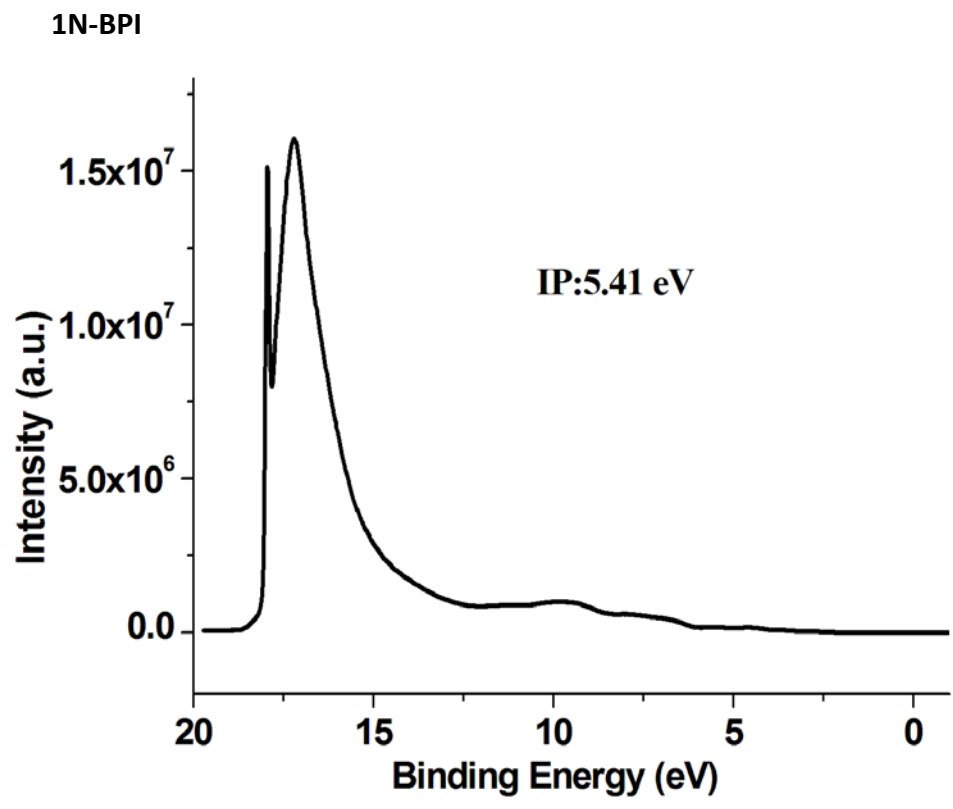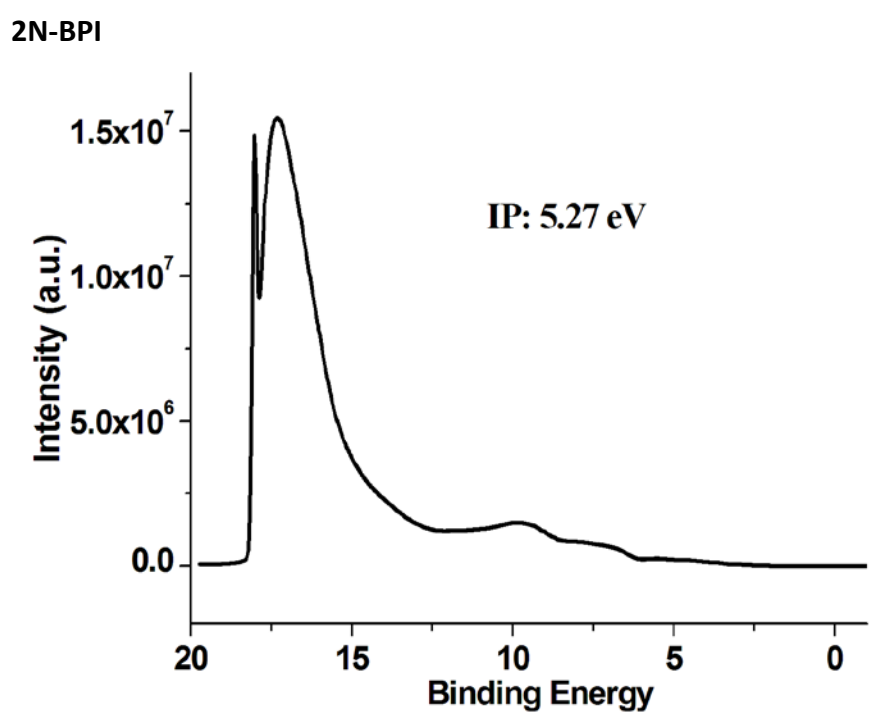

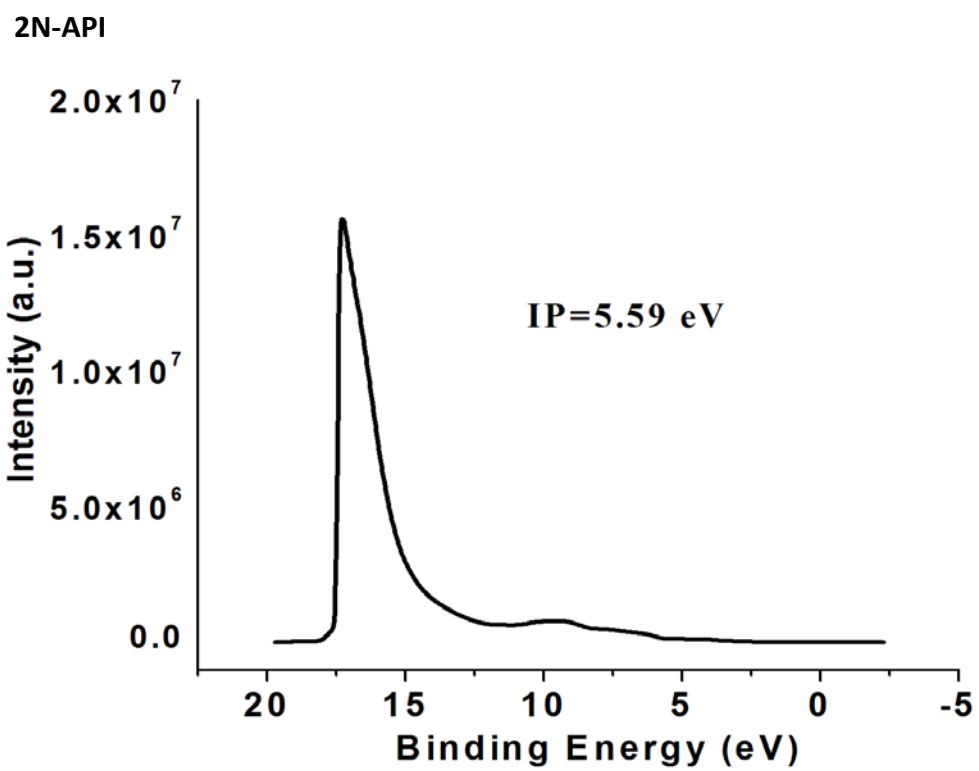

Supplement: c6ra13605b1.pdf [file c6ra13605b1.pdf]
